# Supplementary material for: Revealing a hidden conducting state by manipulating the intracellular domains in KV10.1 exposes the coupling between two gating mechanisms
Source: eLife. 2024 Sep 11;12:RP91420. doi: 10.7554/eLife.91420 (PMC11390113; doi:10.7554/eLife.91420)
Supplement: Figure 1—source data 1. [file elife-91420-fig1-data1.xlsx]

## Sheet: Fig1B
V (mV)	∆PAS Cap I (A)							E600R I (A)											WT I (A)
-90		-4.58192e-08	-1.26841e-07		-6.06906e-08						-5.49921e-08	-7.81133e-08	-1.99414e-08	1.23405e-08	4.8442e-09	-2.47461e-08	-2.62356e-08	-2.67158e-08		-6.05638e-08	-5.81923e-08		-5.15513e-08	-2.66591e-08
-80	-2.16639e-08	3.68467e-07	1.64898e-06	-1.34537e-07	3.18451e-07	-4.67694e-08	-7.63745e-08	-3.70899e-08	-7.99944e-08	-4.5467e-08	1.10358e-07	1.63811e-06	1.41367e-07	3.81108e-07	4.90634e-07	6.22453e-07	8.40373e-08	6.00457e-08	-4.84598e-08	-1.63313e-07	-8.729e-09	-6.78846e-08	-1.25928e-07	2.04023e-08
-70	5.23112e-07	1.45164e-06	5.40955e-06	3.59793e-07	1.4076e-06	5.22485e-07	8.3779e-07	1.45563e-07	1.31338e-06	2.45691e-07	9.5389e-07	7.62336e-06	9.36032e-07	1.84984e-06	2.46271e-06	2.7671e-06	4.80858e-07	4.84673e-07	3.67052e-08	-2.46013e-07	6.25786e-08	-2.09311e-07	-1.5733e-07	1.03626e-07
-60	1.65596e-06	3.89119e-06	1.31753e-05	1.45319e-06	3.89269e-06	2.28102e-06	2.85438e-06	1.00933e-06	6.59582e-06	1.90954e-06	4.32696e-06	2.49744e-05	3.79842e-06	6.50272e-06	8.33474e-06	8.96351e-06	1.77727e-06	1.90821e-06	1.8255e-07	-2.88183e-07	1.72302e-07	-2.39202e-07	-1.28798e-07	2.48762e-07
-50	3.9472e-06	8.52271e-06	2.4215e-05	4.07907e-06	8.52308e-06	6.29162e-06	6.53492e-06	3.79245e-06	2.12694e-05	8.05977e-06	1.41112e-05	5.76847e-05	1.09831e-05	1.81235e-05	2.16289e-05	2.19631e-05	5.63801e-06	5.42755e-06	4.42968e-07	-2.29618e-07	3.44914e-07	-3.04069e-07	4.26237e-08	5.19967e-07
-40	7.8824e-06	1.54191e-05	3.84227e-05	8.89059e-06	1.55831e-05	1.30922e-05	1.20646e-05	9.95165e-06	4.66353e-05	2.39636e-05	3.36069e-05	9.35485e-05	2.4318e-05	3.68204e-05	4.21176e-05	3.87454e-05	1.39694e-05	1.21776e-05	9.38497e-07	-1.11834e-07	6.33506e-07	-2.77147e-07	5.98023e-07	1.20855e-06
-30	1.49606e-05	2.37236e-05	5.20758e-05	1.63949e-05	2.43143e-05	2.26101e-05	1.87701e-05	2.00211e-05	6.87762e-05	5.04372e-05	5.86923e-05	0.000115979	4.10008e-05	5.7541e-05	6.23362e-05	5.2837e-05	2.63626e-05	2.13089e-05	2.00708e-06	2.24642e-07	1.1571e-06	-1.74185e-07	1.94573e-06	2.87823e-06
-20	2.36841e-05	3.17662e-05	6.26397e-05	2.55464e-05	3.2734e-05	3.23072e-05	2.51715e-05	2.89706e-05	8.10028e-05	7.81439e-05	7.99318e-05	0.000123982	5.52028e-05	7.29084e-05	7.60859e-05	6.11717e-05	3.86562e-05	3.01577e-05	4.40885e-06	1.03436e-06	2.27947e-06	3.57596e-08	4.94491e-06	6.594e-06
-10	3.25171e-05	3.82336e-05	6.7592e-05	3.45654e-05	4.02915e-05	4.01991e-05	2.98724e-05	3.35769e-05	8.64363e-05	9.53991e-05	9.12211e-05	0.000118866	6.3459e-05	8.24789e-05	8.40503e-05	6.3315e-05	4.31502e-05	3.73682e-05	9.42776e-06	3.01248e-06	4.68594e-06	7.22841e-07	9.11769e-06	1.35725e-05
-0.0047947	4.13476e-05	3.82331e-05	6.75949e-05	4.32604e-05	4.0291e-05	4.64655e-05	2.98717e-05	3.68766e-05	8.89233e-05	9.99324e-05	9.12195e-05	0.000118866	6.34587e-05	8.24793e-05	8.40511e-05	6.33162e-05	6.53363e-05	3.88527e-05	1.79145e-05	1.49688e-05	3.39826e-06	5.92151e-06	3.23573e-05	3.42081e-05
10	4.13479e-05	3.94758e-05	5.94884e-05	4.326e-05	4.21446e-05	4.64646e-05	3.41257e-05	3.68761e-05	8.89239e-05	9.99331e-05	8.65165e-05	9.73093e-05	6.04703e-05	8.19422e-05	8.16871e-05	5.63536e-05	5.4219e-05	3.85883e-05	3.47656e-05	9.08117e-06	1.38102e-05	2.05837e-07	4.30553e-05	4.0363e-05
20	4.21542e-05	3.59112e-05	4.83354e-05	4.57331e-05	3.7828e-05	4.53478e-05	3.19153e-05	3.22746e-05	8.31146e-05	8.893e-05	7.57213e-05	7.55277e-05	5.22571e-05	7.56329e-05	7.38175e-05	4.80281e-05	4.78357e-05	3.49185e-05	5.04486e-05	2.01949e-05	2.14422e-05	3.52175e-06	5.7149e-05	5.12438e-05
30	3.75497e-05	3.02352e-05	3.51576e-05	4.21813e-05	3.14205e-05	3.94279e-05	2.78206e-05	2.71619e-05	7.42462e-05	7.41334e-05	6.3904e-05	5.52075e-05	4.24903e-05	6.49074e-05	6.19256e-05	3.93037e-05	3.98004e-05	2.99073e-05	6.77771e-05	3.4298e-05	2.86234e-05	8.04657e-06	6.93189e-05	6.14238e-05
40	3.09771e-05	2.47002e-05	2.45107e-05	3.58527e-05	2.56008e-05	3.20058e-05	2.37925e-05	2.08768e-05	6.21907e-05	6.04102e-05	5.58075e-05	3.90474e-05	3.32508e-05	5.36108e-05	4.86155e-05	3.15262e-05	3.15389e-05	2.48599e-05	8.29659e-05	5.08017e-05	3.5741e-05	1.34494e-05	8.0544e-05	6.99392e-05
50	2.47485e-05	2.16196e-05	1.84366e-05	2.96131e-05	2.32871e-05	2.68023e-05	2.26135e-05	1.59169e-05	4.96226e-05	5.17497e-05	5.36993e-05	2.96519e-05	2.74517e-05	4.32166e-05	3.7974e-05	2.59311e-05	2.54369e-05	2.18305e-05	9.47446e-05	6.65298e-05	4.16573e-05	1.96691e-05	9.11153e-05	7.70799e-05
60	2.18607e-05	2.12227e-05	1.66683e-05	2.6379e-05	2.44141e-05	2.56341e-05	2.46592e-05	1.34875e-05	4.04009e-05	4.95861e-05	5.72847e-05	2.58603e-05	2.48439e-05	3.74721e-05	3.24716e-05	2.3478e-05	2.30513e-05	2.13856e-05	0.000103788	8.16389e-05	4.68443e-05	2.62892e-05	0.000100442	8.35487e-05
70	2.22231e-05	2.30875e-05	1.75556e-05	2.63344e-05	2.75582e-05	2.77171e-05	2.92077e-05	1.36578e-05	3.62467e-05	5.27976e-05	6.49349e-05	2.54214e-05	2.52624e-05	3.53621e-05	3.15252e-05	2.3444e-05	2.3429e-05	2.26844e-05	0.000109631	9.54277e-05	5.08252e-05	3.28186e-05	0.000107034	8.89354e-05
80	2.51379e-05	2.62616e-05	2.01628e-05	2.85393e-05	3.18448e-05	3.18719e-05	3.53602e-05	1.52667e-05	3.6685e-05	5.93667e-05	7.47553e-05	2.66796e-05	2.71691e-05	3.6373e-05	3.32672e-05	2.47359e-05	2.57267e-05	2.52812e-05	0.000113173	0.000106477	5.3922e-05	3.88597e-05	0.000114133	9.32639e-05
90	2.94836e-05	3.04437e-05	2.36367e-05	3.2171e-05	3.66999e-05	3.72042e-05	4.24e-05	1.77337e-05	3.96601e-05	6.79026e-05	8.57157e-05	2.88243e-05	3.01414e-05	3.91266e-05	3.64455e-05	2.69078e-05	2.90795e-05	2.84825e-05	0.000114167	0.000115553	5.59658e-05	4.39588e-05	0.000118794	9.64189e-05
100	3.46822e-05	3.49425e-05	2.7771e-05	3.65466e-05	4.21635e-05	4.31214e-05	4.98501e-05	2.06532e-05	4.39062e-05	7.7458e-05	9.68143e-05	3.11313e-05	3.36145e-05	4.30235e-05	4.04346e-05	2.95003e-05	3.34346e-05	3.19412e-05	0.000113289	0.00012178	5.70767e-05	4.84486e-05	0.000122033	9.8353e-05
110	4.03584e-05	3.96553e-05	3.18679e-05	4.12065e-05	4.75643e-05	4.92552e-05	5.73044e-05	2.40293e-05	4.89474e-05	8.69916e-05	0.000107455	3.34255e-05	3.72209e-05	4.73897e-05	4.50152e-05	3.23316e-05	3.86315e-05	3.58729e-05	0.000110608	0.000125163	5.71054e-05	5.12913e-05	0.000125187	9.99182e-05
120	4.57803e-05	4.43184e-05	3.58392e-05	4.60202e-05	5.27806e-05	5.5461e-05	6.43995e-05	2.73871e-05	5.4234e-05	9.60636e-05	0.000117181	3.53877e-05	4.08273e-05	5.19614e-05	4.98042e-05	3.51593e-05	4.93611e-05	4.09443e-05	0.000106324	0.000126348	5.64461e-05	5.2823e-05	0.000126591	0.00010084
130	5.12794e-05	4.86276e-05	3.92806e-05	5.05663e-05	5.76729e-05	6.14222e-05	7.08348e-05	3.09157e-05	5.96951e-05	0.000104178	0.000125708	3.68473e-05	4.42044e-05	5.65911e-05	5.44731e-05	3.78224e-05	5.47543e-05	4.59398e-05	0.000100566	0.000125102	5.48312e-05	5.2949e-05	0.000127038	0.000101367
140	5.59047e-05			5.49837e-05		6.70306e-05	7.66998e-05	3.42412e-05	6.4788e-05	0.000111351									9.41758e-05			5.09546e-05
