# Supplementary material for: Revealing a hidden conducting state by manipulating the intracellular domains in KV10.1 exposes the coupling between two gating mechanisms
Source: eLife. 2024 Sep 11;12:RP91420. doi: 10.7554/eLife.91420 (PMC11390113; doi:10.7554/eLife.91420)
Supplement: Figure 1—source data 2. [file elife-91420-fig1-data2.xlsx]

## Sheet: Fig1D
Stim mV	Rise time DeltaPASCap							Rise time E600R											Rise time WT
-100	0.0046715	0.00472593	0.00502238	0.00459225	0.00490573	0.0046907	0.00456438	0.00470943	0.00555707	0.00536577	0.00455029	0.00471292	0.00496281	0.00472729	0.00471344	0.00648963	0.00490701	0.0046964	0.00481659	0.00512404	0.00512541	0.00497422	0.00542489	0.00476378
-90	0.202046	0.151763	0.0782756	0.165341	0.102383	0.109086	0.131899	0.0276935	0.182261	0.013977	0.0104891	0.144494	0.00828955	0.102975	0.00507948	0.154099	0.00495704	0.00493648	0.00465371	0.00482737	0.00450344	0.00496384	0.00497551	0.00797781
-80	0.224234	0.206161	0.183785	0.212291	0.185883	0.208098	0.179895	0.0843979	0.238767	0.176854	0.134458	0.226465	0.1802	0.223968	0.233531	0.23034	0.0638092	0.157074	0.00453649	0.0045208	0.00528318	0.00492966	0.00538602	0.00855874
-70	0.234091	0.226591	0.220277	0.229689	0.21075	0.223258	0.212693	0.217643	0.24579	0.227862	0.225928	0.240399	0.237995	0.245797	0.245562	0.242361	0.223735	0.234273	0.00453815	0.00454176	0.00776135	0.00471908	0.00653608	0.00915896
-60	0.235	0.229179	0.226653	0.235429	0.224486	0.223838	0.213843	0.234581	0.240389	0.235694	0.241574	0.243832	0.241983	0.251324	0.248314	0.24284	0.242357	0.23727	0.00819649	0.00454263	0.00674098	0.00478024	0.0186847	0.0305812
-50	0.233949	0.233057	0.226332	0.234576	0.22362	0.22176	0.203363	0.228883	0.222372	0.234697	0.240666	0.233495	0.244466	0.24748	0.243472	0.236976	0.245748	0.24568	0.0202975	0.00453721	0.0127662	0.00458398	0.0229882	0.0516899
-40	0.226733	0.22897	0.219749	0.226155	0.21805	0.209281	0.195698	0.217885	0.200517	0.22298	0.233291	0.217618	0.241366	0.239734	0.232288	0.220197	0.23988	0.241595	0.0110837	0.00477378	0.0149902	0.00587711	0.0562658	0.0978937
-30	0.213171	0.221959	0.205441	0.21859	0.201876	0.196622	0.1693	0.192065	0.17149	0.205742	0.216139	0.201288	0.231528	0.227697	0.21748	0.193458	0.233867	0.229368	0.0188798	0.0120882	0.0231802	0.0225942	0.0592964	0.0728728
-20	0.198561	0.204697	0.189362	0.208075	0.187587	0.181648	0.1693	0.131669	0.155046	0.160795	0.197571	0.181038	0.221656	0.217796	0.203557	0.163658	0.219468	0.218559	0.0258765	0.0294237	0.0150303	0.0222901	0.0585925	0.0540869
-10	0.00649167	0.159392	0.0628736	0.134392	0.0755341	0.10815	0.0920468	0.123655	0.0636918	0.156982	0.159735	0.141297	0.1898	0.164281	0.129971	0.0901597	0.154755	0.125477	0.0284377	0.010155	0.00528676	0.00487741	0.0265572	0.014692
0	0.154434	0.166466	0.125509	0.146485	0.101456	0.107055	0.0767007	0.120384	0.0921863	0.144776	0.155983	0.149021	0.198975	0.183734	0.163334	0.132471	0.168996	0.157688	0.0266203	0.00529774	0.0308616	0.0125889	0.0357422	0.0366825
10	0.145953	0.152535	0.117278	0.137645	0.0973622	0.0928902	0.0703163	0.0977795	0.089973	0.127476	0.141881	0.136458	0.191174	0.178263	0.153445	0.117694	0.157791	0.143744	0.043468	0.066489	0.0468744	0.0501847	0.0363313	0.0363833
20	0.126397	0.139497	0.109122	0.128042	0.096655	0.0781599	0.0617332	0.0804007	0.0845812	0.103383	0.122486	0.11778	0.184141	0.167547	0.139988	0.0989307	0.142558	0.130365	0.0396911	0.0910824	0.0451767	0.0665699	0.0333166	0.0318605
30	0.0971856	0.120095	0.0912274	0.112968	0.0882722	0.0639708	0.0544897	0.0598953	0.0758481	0.0811551	0.0990987	0.0892312	0.166485	0.14949	0.118478	0.0787124	0.12255	0.112358	0.036453	0.0973474	0.042352	0.0629755	0.0290592	0.0285976
40	0.0636747	0.104554	0.0752204	0.0901737	0.0764632	0.0511899	0.0508301	0.0370462	0.0585378	0.0642537	0.0805241	0.0572802	0.141576	0.116514	0.0817786	0.0509044	0.088139	0.0908012	0.0337848	0.0898565	0.0396	0.077965	0.0249999	0.0251154
50	0.0434145	0.094059	0.0607891	0.0784997	0.0676952	0.0460035	0.0509761	0.0239895	0.0336837	0.0549595	0.0682347	0.0281784	0.115553	0.0787622	0.0462277	0.0298292	0.0512176	0.0619748	0.0313631	0.0889744	0.0332951	0.0845488	0.0222348	0.0220421
60	0.0355895	0.0844077	0.0553771	0.0658938	0.0641722	0.0440005	0.0536369	0.0187587	0.0209452	0.044888	0.0600576	0.0179846	0.0963506	0.0486856	0.0293325	0.0202408	0.0315798	0.0415892	0.0290836	0.0833658	0.034572	0.0798632	0.0206354	0.0199943
70	0.0333496	0.0788675	0.0516998	0.0645956	0.061034	0.0439775	0.0532664	0.0157334	0.0156303	0.039157	0.0523717	0.0134847	0.0820493	0.0332988	0.0212448	0.0157449	0.0232906	0.0290574	0.0272526	0.0789315	0.0321493	0.0802916	0.0187318	0.0179851
80	0.0326379	0.0733838	0.0490615	0.0609021	0.0597262	0.0428562	0.0531786	0.0139011	0.0129571	0.030089	0.0458561	0.0112517	0.0677935	0.0252371	0.0170154	0.0134209	0.0192762	0.0223436	0.0253299	0.0767907	0.0307661	0.0857681	0.0174956	0.0168033
90	0.031412	0.0671712	0.0475808	0.0577337	0.0553845	0.0420144	0.0523953	0.0121491	0.0110908	0.0209011	0.0375207	0.00936794	0.0594167	0.0202357	0.0144972	0.0119353	0.0170858	0.018715	0.0240608	0.0752822	0.0302744	0.0847759	0.0166059	0.0159186
100	0.0306791	0.0638826	0.0461007	0.0540321	0.0524875	0.0400779	0.0499257	0.0108929	0.00984013	0.0154982	0.0267177	0.00862975	0.0494993	0.017029	0.0128631	0.0108719	0.015852	0.0164877	0.0235341	0.0752076	0.0295958	0.0842194	0.0156508	0.0151225
110	0.029208	0.0579595	0.0435196	0.0505854	0.0492687	0.0381781	0.0475189	0.0100412	0.00882916	0.0128282	0.0176938	0.00797608	0.0422158	0.0147766	0.0115949	0.0100619	0.0160498	0.0156056	0.0235167	0.0762576	0.0306618	0.0811592	0.015215	0.0143572
120	0.0264596	0.0532189	0.0406375	0.0474159	0.0442988	0.0360624	0.0449833	0.00925653	0.00807975	0.0110108	0.0140616	0.00764074	0.0357814	0.013014	0.0104347	0.0092273	0.0155973	0.0149052	0.0239296	0.0783664	0.0326938	0.0803734	0.0149906	0.0139603
