# Supplementary material for: Revealing a hidden conducting state by manipulating the intracellular domains in KV10.1 exposes the coupling between two gating mechanisms
Source: eLife. 2024 Sep 11;12:RP91420. doi: 10.7554/eLife.91420 (PMC11390113; doi:10.7554/eLife.91420)
Supplement: Figure 2—source data 1. [file elife-91420-fig2-data1.xlsx]

## Sheet: Fig2A
V(mV)	∆EAG I (A)						∆PAS Cap I (A)							∆2-10I (A)						E600R i (A)
-90		-8.78634e-08	-3.5605e-08			-4.13497e-08	-4.08528e-08	-1.26841e-07		-4.58192e-08		-6.06906e-08			-6.08983e-08	-3.72705e-08	-4.25105e-08	-2.78758e-08	-7.81262e-08				-5.49921e-08	-7.81133e-08	-1.99414e-08	1.23405e-08	4.8442e-09	-2.47461e-08	-2.62356e-08	-2.67158e-08
-80	-2.3084e-08	-1.02941e-07	5.01218e-08	-7.86909e-08	-5.91782e-08	1.13091e-07	1.89576e-08	1.64898e-06	-2.16639e-08	3.68467e-07	-1.34537e-07	3.18451e-07	-7.63745e-08	-9.39217e-08	1.41446e-06	9.02956e-07	7.93601e-07	4.63462e-07	1.96532e-07	-3.70899e-08	-7.99944e-08	-4.5467e-08	1.10358e-07	1.63811e-06	1.41367e-07	3.81108e-07	4.90634e-07	6.22453e-07	8.40373e-08	6.00457e-08
-70	-3.04179e-08	8.00629e-09	4.74223e-07	-6.70259e-08	3.82963e-08	8.3908e-07	2.54875e-07	5.40955e-06	5.23112e-07	1.45164e-06	3.59793e-07	1.4076e-06	8.3779e-07	1.9412e-07	5.33326e-06	3.4345e-06	3.37322e-06	1.91942e-06	8.53544e-07	1.45563e-07	1.31338e-06	2.45691e-07	9.5389e-07	7.62336e-06	9.36032e-07	1.84984e-06	2.46271e-06	2.7671e-06	4.80858e-07	4.84673e-07
-60	2.7362e-08	6.83096e-07	2.52442e-06	1.86381e-07	4.14368e-07	3.81753e-06	1.1955e-06	1.31753e-05	1.65596e-06	3.89119e-06	1.45319e-06	3.89269e-06	2.85438e-06	8.73354e-07	1.37228e-05	9.23928e-06	9.19367e-06	5.21463e-06	2.29477e-06	1.00933e-06	6.59582e-06	1.90954e-06	4.32696e-06	2.49744e-05	3.79842e-06	6.50272e-06	8.33474e-06	8.96351e-06	1.77727e-06	1.90821e-06
-50	3.39184e-07	3.19979e-06	1.078e-05	1.40739e-06	1.99177e-06	1.31606e-05	4.25791e-06	2.4215e-05	3.9472e-06	8.52271e-06	4.07907e-06	8.52308e-06	6.53492e-06	2.33275e-06	2.79175e-05	1.9542e-05	1.86421e-05	1.09196e-05	4.76376e-06	3.79245e-06	2.12694e-05	8.05977e-06	1.41112e-05	5.76847e-05	1.09831e-05	1.81235e-05	2.16289e-05	2.19631e-05	5.63801e-06	5.42755e-06
-40	1.55663e-06	1.00732e-05	3.51279e-05	6.65134e-06	7.81139e-06	3.28257e-05	1.18183e-05	3.84227e-05	7.8824e-06	1.54191e-05	8.89059e-06	1.55831e-05	1.20646e-05	4.92855e-06	4.53109e-05	3.31805e-05	2.93058e-05	1.82507e-05	8.08707e-06	9.95165e-06	4.66353e-05	2.39636e-05	3.36069e-05	9.35485e-05	2.4318e-05	3.68204e-05	4.21176e-05	3.87454e-05	1.39694e-05	1.21776e-05
-30	4.99768e-06	2.38368e-05	7.61946e-05	2.13902e-05	2.44363e-05	5.38554e-05	2.34988e-05	5.20758e-05	1.49606e-05	2.37236e-05	1.63949e-05	2.43143e-05	1.87701e-05	8.48665e-06	6.09045e-05	4.63421e-05	3.81305e-05	2.51204e-05	1.15606e-05	2.00211e-05	6.87762e-05	5.04372e-05	5.86923e-05	0.000115979	4.10008e-05	5.7541e-05	6.23362e-05	5.2837e-05	2.63626e-05	2.13089e-05
-20	1.16955e-05	4.21501e-05	0.000113109	4.57407e-05	5.17667e-05	6.95581e-05	3.54185e-05	6.26397e-05	2.36841e-05	3.17662e-05	2.55464e-05	3.2734e-05	2.51715e-05	1.21141e-05	7.20191e-05	5.6242e-05	4.37694e-05	3.02344e-05	1.44165e-05	2.89706e-05	8.10028e-05	7.81439e-05	7.99318e-05	0.000123982	5.52028e-05	7.29084e-05	7.60859e-05	6.11717e-05	3.86562e-05	3.01577e-05
-10	2.10256e-05	6.15069e-05	0.000138249	7.08859e-05	7.77404e-05	8.08864e-05	4.53302e-05	6.7592e-05	3.25171e-05	3.82336e-05	3.45654e-05	4.02915e-05	2.98724e-05	1.51407e-05	7.94511e-05	6.32237e-05	4.58557e-05	3.30875e-05	1.65034e-05	3.35769e-05	8.64363e-05	9.53991e-05	9.12211e-05	0.000118866	6.3459e-05	8.24789e-05	8.40503e-05	6.3315e-05	4.31502e-05	3.73682e-05
0	3.38961e-05	6.15071e-05	0.000138248	9.35126e-05	7.7738e-05	8.08881e-05	4.53302e-05	6.75949e-05	4.13476e-05	3.82331e-05	4.32604e-05	4.0291e-05	2.98717e-05	1.80193e-05	7.94504e-05	6.32248e-05	5.02192e-05	3.30859e-05	1.65036e-05	3.68766e-05	8.89233e-05	9.99324e-05	9.12195e-05	0.000118866	6.34587e-05	8.24793e-05	8.40511e-05	6.33162e-05	6.53363e-05	3.88527e-05
10	3.38961e-05	7.22258e-05	0.000156579	9.35143e-05	0.000104184	8.74046e-05	5.01526e-05	5.94884e-05	4.13479e-05	3.94758e-05	4.326e-05	4.21446e-05	3.41257e-05	1.80194e-05	8.12253e-05	6.61737e-05	4.79532e-05	3.39648e-05	1.71051e-05	3.68761e-05	8.89239e-05	9.99331e-05	8.65165e-05	9.73093e-05	6.04703e-05	8.19422e-05	8.16871e-05	5.63536e-05	5.4219e-05	3.85883e-05
20	3.79276e-05	7.3298e-05	0.00016099	0.000101008	0.000112141	8.87047e-05	4.98194e-05	4.83354e-05	4.21542e-05	3.59112e-05	4.57331e-05	3.7828e-05	3.19153e-05	1.87938e-05	7.94888e-05	6.61657e-05	4.55414e-05	3.30344e-05	1.72006e-05	3.22746e-05	8.31146e-05	8.893e-05	7.57213e-05	7.55277e-05	5.22571e-05	7.56329e-05	7.38175e-05	4.80281e-05	4.78357e-05	3.49185e-05
30	3.73782e-05	6.94081e-05	0.000161492	0.000102417	0.000115938	8.78955e-05	4.67727e-05	3.51576e-05	3.75497e-05	3.02352e-05	4.21813e-05	3.14205e-05	2.78206e-05	1.83736e-05	7.67739e-05	6.60148e-05	4.32646e-05	3.20727e-05	1.72879e-05	2.71619e-05	7.42462e-05	7.41334e-05	6.3904e-05	5.52075e-05	4.24903e-05	6.49074e-05	6.19256e-05	3.93037e-05	3.98004e-05	2.99073e-05
40	3.31355e-05	6.0848e-05	0.00015899	0.00010054	0.000116677	8.47676e-05	4.1576e-05	2.45107e-05	3.09771e-05	2.47002e-05	3.58527e-05	2.56008e-05	2.37925e-05	1.7881e-05	7.51615e-05	6.72654e-05	4.21011e-05	3.22616e-05	1.79786e-05	2.08768e-05	6.21907e-05	6.04102e-05	5.58075e-05	3.90474e-05	3.32508e-05	5.36108e-05	4.86155e-05	3.15262e-05	3.15389e-05	2.48599e-05
50	2.64165e-05	4.86721e-05	0.00015282	9.46771e-05	0.000114415	7.92366e-05	3.46716e-05	1.84366e-05	2.47485e-05	2.16196e-05	2.96131e-05	2.32871e-05	2.26135e-05	1.75805e-05	7.58312e-05	7.08928e-05	4.27204e-05	3.4108e-05	1.97054e-05	1.59169e-05	4.96226e-05	5.17497e-05	5.36993e-05	2.96519e-05	2.74517e-05	4.32166e-05	3.7974e-05	2.59311e-05	2.54369e-05	2.18305e-05
60	1.91745e-05	3.56361e-05	0.000142057	8.48205e-05	0.000109265	7.04725e-05	2.67295e-05	1.66683e-05	2.18607e-05	2.12227e-05	2.6379e-05	2.44141e-05	2.46592e-05	1.83741e-05	7.93616e-05	7.69935e-05	4.52302e-05	3.76647e-05	2.24553e-05	1.34875e-05	4.04009e-05	4.95861e-05	5.72847e-05	2.58603e-05	2.48439e-05	3.74721e-05	3.24716e-05	2.3478e-05	2.30513e-05	2.13856e-05
70	1.34409e-05	2.50929e-05	0.000124604	7.05986e-05	9.97675e-05	5.6817e-05	1.88477e-05	1.75556e-05	2.22231e-05	2.30875e-05	2.63344e-05	2.75582e-05	2.92077e-05	2.03982e-05	8.46145e-05	8.4482e-05	4.90384e-05	4.23418e-05	2.60062e-05	1.36578e-05	3.62467e-05	5.27976e-05	6.49349e-05	2.54214e-05	2.52624e-05	3.53621e-05	3.15252e-05	2.3444e-05	2.3429e-05	2.26844e-05
80	9.65503e-06	1.8834e-05	9.91824e-05	5.31266e-05	8.35968e-05	3.87464e-05	1.27735e-05	2.01628e-05	2.51379e-05	2.62616e-05	2.85393e-05	3.18448e-05	3.53602e-05	2.30588e-05	9.09619e-05	9.26056e-05	5.33131e-05	4.75386e-05	2.98851e-05	1.52667e-05	3.6685e-05	5.93667e-05	7.47553e-05	2.66796e-05	2.71691e-05	3.6373e-05	3.32672e-05	2.47359e-05	2.57267e-05	2.52812e-05
90	7.9795e-06	1.63943e-05	7.20191e-05	3.7029e-05	5.88206e-05	2.54188e-05	9.71356e-06	2.36367e-05	2.94836e-05	3.04437e-05	3.2171e-05	3.66999e-05	4.24e-05	2.60971e-05	9.76996e-05	0.000100529	5.75286e-05	5.26706e-05	3.3665e-05	1.77337e-05	3.96601e-05	6.79026e-05	8.57157e-05	2.88243e-05	3.01414e-05	3.91266e-05	3.64455e-05	2.69078e-05	2.90795e-05	2.84825e-05
100	7.60418e-06	1.62172e-05	5.53811e-05	2.67413e-05	3.73766e-05	2.00035e-05	8.83623e-06	2.7771e-05	3.46822e-05	3.49425e-05	3.65466e-05	4.21635e-05	4.98501e-05	2.91379e-05	0.00010405	0.000107999	6.13813e-05	5.7403e-05	3.71946e-05	2.06532e-05	4.39062e-05	7.7458e-05	9.68143e-05	3.11313e-05	3.36145e-05	4.30235e-05	4.04346e-05	2.95003e-05	3.34346e-05	3.19412e-05
110	7.85065e-06	1.73762e-05	4.98229e-05	2.158e-05	2.87319e-05	1.8545e-05	9.03286e-06	3.18679e-05	4.03584e-05	3.96553e-05	4.12065e-05	4.75643e-05	5.73044e-05	3.14426e-05	0.000109544	0.000114663	6.44277e-05	6.13574e-05	4.01219e-05	2.40293e-05	4.89474e-05	8.69916e-05	0.000107455	3.34255e-05	3.72209e-05	4.73897e-05	4.50152e-05	3.23316e-05	3.86315e-05	3.58729e-05
120	8.50155e-06	1.91556e-05	4.93916e-05	1.97636e-05	2.64096e-05	1.86224e-05	9.7004e-06	3.58392e-05	4.57803e-05	4.43184e-05	4.60202e-05	5.27806e-05	6.43995e-05	3.31126e-05	0.000113925	0.000120314	6.65525e-05	6.43372e-05	4.24723e-05	2.73871e-05	5.4234e-05	9.60636e-05	0.000117181	3.53877e-05	4.08273e-05	5.19614e-05	4.98042e-05	3.51593e-05	4.93611e-05	4.09443e-05
130	9.33511e-06	2.09573e-05	5.06912e-05	1.92971e-05	2.63617e-05	1.93229e-05	1.06201e-05	3.92806e-05	5.12794e-05	4.86276e-05	5.05663e-05	5.76729e-05	7.08348e-05	3.38648e-05	0.00011699	0.000124897	6.76327e-05	6.62481e-05	4.37511e-05	3.09157e-05	5.96951e-05	0.000104178	0.000125708	3.68473e-05	4.42044e-05	5.65911e-05	5.44731e-05	3.78224e-05	5.47543e-05	4.59398e-05
140	1.00652e-05			1.96216e-05	2.70457e-05				5.59047e-05		5.49837e-05		7.66998e-05	3.3244e-05						3.42412e-05	6.4788e-05	0.000111351
