# Supplementary material for: Revealing a hidden conducting state by manipulating the intracellular domains in KV10.1 exposes the coupling between two gating mechanisms
Source: eLife. 2024 Sep 11;12:RP91420. doi: 10.7554/eLife.91420 (PMC11390113; doi:10.7554/eLife.91420)
Supplement: Figure 2—source data 2. [file elife-91420-fig2-data2.xlsx]

## Sheet: Fig2D
V (mV)	∆2-10 I (A)						∆2-10 Split I (A)
-90		-6.08983e-08	-3.72705e-08	-4.25105e-08	-2.78758e-08	-7.81262e-08
-80	-9.39217e-08	1.41446e-06	9.02956e-07	7.93601e-07	4.63462e-07	1.96532e-07	-4.93438e-08	-2.4104e-08	-6.09968e-08	-3.06991e-08	-2.89105e-08	2.01998e-06
-70	1.9412e-07	5.33326e-06	3.4345e-06	3.37322e-06	1.91942e-06	8.53544e-07	-1.02989e-07	-7.84878e-08	-1.24404e-07	-1.82483e-07	-4.19007e-08	1.95058e-06
-60	8.73354e-07	1.37228e-05	9.23928e-06	9.19367e-06	5.21463e-06	2.29477e-06	-1.51583e-07	-1.53296e-07	-1.4843e-07	-3.35154e-07	-6.58334e-08	1.84357e-06
-50	2.33275e-06	2.79175e-05	1.9542e-05	1.86421e-05	1.09196e-05	4.76376e-06	-2.09235e-07	-2.17585e-07	-2.58842e-07	-5.48339e-07	-1.0739e-07	1.72658e-06
-40	4.92855e-06	4.53109e-05	3.31805e-05	2.93058e-05	1.82507e-05	8.08707e-06	-2.45317e-07	-2.47365e-07	-4.05063e-07	-8.30251e-07	-1.87441e-07	1.62162e-06
-30	8.48665e-06	6.09045e-05	4.63421e-05	3.81305e-05	2.51204e-05	1.15606e-05	-2.87004e-07	-2.50363e-07	-5.18877e-07	-1.30478e-06	-3.09831e-07	1.51443e-06
-20	1.21141e-05	7.20191e-05	5.6242e-05	4.37694e-05	3.02344e-05	1.44165e-05	-4.08029e-07	-3.71116e-07	-8.82586e-07	-2.36247e-06	-6.17345e-07	1.17102e-06
-10	1.51407e-05	7.94511e-05	6.32237e-05	4.58557e-05	3.30875e-05	1.65034e-05	-1.36173e-06	-1.47862e-06	-3.11439e-06	-8.00758e-06	-2.30119e-06	5.59702e-08
0	1.80193e-05	7.94504e-05	6.32248e-05	5.02192e-05	3.30859e-05	1.65036e-05	2.28524e-06	2.13722e-06	4.14159e-06	9.6382e-06	3.28466e-06	5.49129e-06
10	1.80194e-05	8.12253e-05	6.61737e-05	4.79532e-05	3.39648e-05	1.71051e-05	1.40612e-06	1.27447e-06	2.07084e-06	5.14997e-06	2.86057e-06	6.12997e-06
20	1.87938e-05	7.94888e-05	6.61657e-05	4.55414e-05	3.30344e-05	1.72006e-05	1.53362e-06	1.33661e-06	1.78944e-06	5.22422e-06	3.47984e-06	7.28396e-06
30	1.83736e-05	7.67739e-05	6.60148e-05	4.32646e-05	3.20727e-05	1.72879e-05	1.85442e-06	1.5185e-06	1.73531e-06	5.23003e-06	3.6636e-06	7.6839e-06
40	1.7881e-05	7.51615e-05	6.72654e-05	4.21011e-05	3.22616e-05	1.79786e-05	2.34823e-06	1.70805e-06	1.70927e-06	4.92973e-06	3.31112e-06	7.2131e-06
50	1.75805e-05	7.58312e-05	7.08928e-05	4.27204e-05	3.4108e-05	1.97054e-05	3.12768e-06	2.11367e-06	1.87524e-06	4.62724e-06	2.71434e-06	6.29845e-06
60	1.83741e-05	7.93616e-05	7.69935e-05	4.52302e-05	3.76647e-05	2.24553e-05	4.38875e-06	2.83291e-06	2.35961e-06	4.95982e-06	2.32335e-06	5.8009e-06
70	2.03982e-05	8.46145e-05	8.4482e-05	4.90384e-05	4.23418e-05	2.60062e-05	6.25766e-06	3.9132e-06	3.19889e-06	6.29625e-06	2.51618e-06	6.66808e-06
80	2.30588e-05	9.09619e-05	9.26056e-05	5.33131e-05	4.75386e-05	2.98851e-05	8.66656e-06	5.36823e-06	4.35889e-06	8.3618e-06	3.25718e-06	8.67285e-06
90	2.60971e-05	9.76996e-05	0.000100529	5.75286e-05	5.26706e-05	3.3665e-05	1.1412e-05	7.17242e-06	5.73149e-06	1.09017e-05	4.25456e-06	1.12958e-05
100	2.91379e-05	0.00010405	0.000107999	6.13813e-05	5.7403e-05	3.71946e-05	1.44349e-05	9.16439e-06	7.26881e-06	1.35832e-05	5.42193e-06	1.42646e-05
110	3.14426e-05	0.000109544	0.000114663	6.44277e-05	6.13574e-05	4.01219e-05	1.73815e-05	1.11699e-05	8.87817e-06	1.61081e-05	6.64574e-06	1.68142e-05
120	3.31126e-05	0.000113925	0.000120314	6.65525e-05	6.43372e-05	4.24723e-05	1.98651e-05	1.29523e-05	1.03492e-05	1.81875e-05	7.80026e-06	1.91194e-05
130	3.38648e-05	0.00011699	0.000124897	6.76327e-05	6.62481e-05	4.37511e-05	2.17356e-05	1.43791e-05	1.16246e-05	1.96643e-05	8.81338e-06	2.08175e-05
140	3.3244e-05						2.27529e-05	1.53155e-05	1.28608e-05	2.04101e-05	9.61231e-06	2.18106e-05
