# Supplementary material for: Revealing a hidden conducting state by manipulating the intracellular domains in KV10.1 exposes the coupling between two gating mechanisms
Source: eLife. 2024 Sep 11;12:RP91420. doi: 10.7554/eLife.91420 (PMC11390113; doi:10.7554/eLife.91420)
Supplement: Figure 3—source data 1. [file elife-91420-fig3-data1.xlsx]

## Sheet: Fig3A
V (mV)	NFR I (A)						1 mM Mg2+ I(A)						5 mM Mg2+ I (A)
-100	-5.31374e-08	3.34888e-09	1.6222e-08	-1.39558e-07	-1.77394e-08	1.2301e-08	-3.33293e-07	-1.13952e-07	2.79353e-08	-3.64739e-09	-4.3467e-08	1.81934e-08	-6.14708e-08	2.88029e-08	-9.75435e-09	-6.18657e-08	1.85012e-08
-80	-3.80348e-08	7.62438e-09	2.15765e-08	-1.00264e-07	-3.88682e-09	1.87189e-08	-2.6782e-07	-8.92475e-08	2.90143e-08	3.26182e-09	-2.54695e-08	2.16294e-08	-7.6051e-08	2.90765e-08	-3.11256e-09	-3.85914e-08	2.20553e-08
-60	-1.34142e-08	1.99751e-08	1.50152e-07	-3.83924e-08	1.15386e-07	1.0921e-07	-1.98623e-07	-6.00964e-08	8.24067e-08	1.31592e-08	-3.53856e-09	5.56374e-08	-3.60728e-08	3.28016e-08	4.95336e-09	-1.62873e-08	2.49596e-08
-40	4.59698e-07	2.05572e-07	2.70458e-06	9.50591e-07	1.66435e-06	9.95488e-07	-5.01741e-08	1.11132e-08	1.09329e-06	2.26483e-07	2.37783e-07	3.64574e-07	-1.19185e-08	1.28912e-07	2.24751e-08	1.09795e-08	3.22544e-08
-20	2.61584e-06	7.71172e-07	7.87019e-06	5.56036e-06	4.98115e-06	2.68989e-06	8.83722e-07	3.75849e-07	4.26153e-06	2.41509e-06	2.05754e-06	1.45102e-06	8.24347e-08	1.15442e-06	3.22379e-07	1.96517e-07	1.32705e-07
0	4.90705e-06	1.23801e-06	1.15423e-05	1.02431e-05	8.21122e-06	4.07961e-06	2.86951e-06	1.05816e-06	7.11242e-06	6.79971e-06	5.47719e-06	2.93733e-06	5.1125e-07	3.53826e-06	2.43805e-06	1.4533e-06	6.70544e-07
20	6.45175e-06	1.37779e-06	1.26487e-05	1.29596e-05	1.07348e-05	4.61213e-06	4.71755e-06	1.46977e-06	7.49596e-06	1.04352e-05	8.53958e-06	3.7215e-06	1.11584e-06	4.8835e-06	6.19076e-06	3.91475e-06	1.4695e-06
40	6.89218e-06	1.08293e-06	1.15478e-05	1.39201e-05	1.21533e-05	3.77291e-06	5.39667e-06	1.36715e-06	4.90065e-06	1.20685e-05	1.01555e-05	3.20008e-06	1.26046e-06	3.82531e-06	8.79418e-06	5.60595e-06	1.72814e-06
60	4.96064e-06	6.97774e-07	8.6122e-06	1.30383e-05	1.19121e-05	2.00339e-06	3.78889e-06	1.16627e-06	2.77401e-06	1.12109e-05	8.58404e-06	1.77019e-06	1.15342e-06	2.51287e-06	8.77539e-06	4.62675e-06	1.23095e-06
80	2.15039e-06	6.32702e-07	5.05618e-06	1.00428e-05	6.80926e-06	1.20919e-06	2.4269e-06	1.34013e-06	2.73741e-06	6.80171e-06	3.65758e-06	1.07366e-06	1.28074e-06	2.61801e-06	5.45694e-06	2.82979e-06	8.57136e-07
100	2.09396e-06	8.71182e-07	4.86409e-06	5.83982e-06	3.52887e-06	1.29743e-06	2.52574e-06	1.79985e-06	3.13516e-06	4.8381e-06	3.23925e-06	1.21387e-06	1.70704e-06	3.11753e-06	4.72389e-06	2.88022e-06	1.00273e-06
120	2.66548e-06	1.34742e-06	4.79791e-06	6.30603e-06	3.94645e-06	1.64845e-06	3.0553e-06	2.51582e-06	3.59269e-06	5.32386e-06	3.68783e-06	1.73586e-06	2.45659e-06	3.59026e-06	5.2838e-06	3.41367e-06	1.52725e-06
