# Supplementary material for: Revealing a hidden conducting state by manipulating the intracellular domains in KV10.1 exposes the coupling between two gating mechanisms
Source: eLife. 2024 Sep 11;12:RP91420. doi: 10.7554/eLife.91420 (PMC11390113; doi:10.7554/eLife.91420)
Supplement: Figure 3—source data 2. [file elife-91420-fig3-data2.xlsx]

## Sheet: Fig3B
V (mV)	Tau activation NFR (0 Mg2+) (s)					Tau activation 1 mM Mg2+ (s)						Tau activation 5 mM Mg (s)
-40	0.33589	0.305275	0.558978	0.337259	0.349302	0.888572	1.36286	0.80066	0.884479	0.98042	0.96579
-20	0.178171	0.155518	0.256657	0.192402	0.202377	0.630071	0.744721	0.601732	0.545557	0.887185	0.70524			1.28004	1.64698	2.2611
0	0.117883	0.112665	0.13072	0.134011	0.150474	0.422831	0.449918	0.396281	0.386989	0.554273	0.443851	2.06472	2.41588	0.864583	0.835997	1.4075
20	0.101939	0.10414	0.106994	0.115152	0.13233	0.335923	0.345607	0.297889	0.3418	0.406809	0.329015	0.913164	0.893058	0.539975	0.611964	0.621424
40	0.109017	0.127095	0.125669	0.118209	0.140968	0.296933	0.321564	0.25228	0.327798	0.36574	0.263236	0.624715	0.701121	0.402715	0.458027	0.388184
60	0.051809	0.230687	0.17958	0.16195	0.127	0.258425	0.50887	0.28286	0.152214	0.368175	0.179779	0.450787	0.718689	0.475789	0.206035	0.229811
80	0.0185702	0.0372685	0.12212	0.041043	0.0371635	0.128417	0.219655	0.2336	0.081809	0.16424	0.110171	0.25314	0.26633	0.26359	0.109021	0.130916
100	0.014145	0.012374	0.057831	0.015104	0.0149705	0.07408	0.0991044	0.0869324	0.0538561	0.099451	0.085726	0.141883	0.14014	0.108181	0.0687472	0.110943
120	0.015962	0.010432	0.04533	0.0161754	0.0176286	0.046674	0.06493	0.0592616	0.0381078	0.069806	0.070756	0.10465	0.091245	0.0692542	0.0465309	0.084634
