# Supplementary material for: Revealing a hidden conducting state by manipulating the intracellular domains in KV10.1 exposes the coupling between two gating mechanisms
Source: eLife. 2024 Sep 11;12:RP91420. doi: 10.7554/eLife.91420 (PMC11390113; doi:10.7554/eLife.91420)
Supplement: Figure 6—source data 1. [file elife-91420-fig6-data1.xlsx]

## Sheet: Fig6B
V (mV)	∆PASCap Rise time (s)									E600R (s)								WT (s)
-160.464	0.248238	0.211029	0.237346	0.240333	0.182707	0.19906	0.280573	0.233195	0.186602	0.317105	0.224888	0.0820871	0.238836	0.104779	0.139483	0.375443	0.113731	0.0602976	0.0409843	0.0811422	0.0786576	0.0443704	0.0497262	0.0549325
-140.461	0.152399	0.257844	0.242085	0.235098	0.2184	0.248488	0.167865	0.201788	0.190632	0.171798	0.199291	0.0812804	0.256269	0.093814	0.111797	0.214345	0.0815242	0.048848	0.0416617	0.0920521	0.0704951	0.0412008	0.046901	0.0526092
-120.46	0.103778	0.20918	0.170192	0.209386	0.228497	0.199175	0.121558	0.144059	0.159821	0.117592	0.12608	0.0814335	0.195494	0.0917476	0.105015	0.116684	0.0783944	0.0411344	0.0355517	0.082302	0.0569432	0.031114	0.0422573	0.0465326
-100.5	0.0978335	0.129454	0.151283	0.183599	0.140909	0.122187	0.101995	0.114038	0.121966	0.102475	0.0845243	0.0743885	0.140985	0.0912215	0.0920649	0.0915916	0.0799698	0.0242854	0.0209956	0.0466244	0.036828	0.031114	0.0278414	0.0295876
-80.5838	0.0791916	0.0717269	0.0965761	0.0967931	0.079684	0.0323891	0.0794796	0.0845973	0.0769578	0.0602964	0.0578866	0.0561761	0.098475	0.0665528	0.0690582	0.0591449	0.0542747	0.0242854	0.0209956	0.0232282	0.0280471	0.031114	0.0191101	0.0178986
-60.6522	0.0568651	0.0216958	0.0320705	0.0185961	0.0228719	0.0323891	0.0419863	0.0427461	0.0283908	0.063125	0.0578866	0.0561761	0.098475	0.0665528	0.0690582	0.0591449	0.0542747	0.0242854	0.0209956	0.0165658	0.0243976	0.031114	0.0164308	0.0150174
-40.8817	0.0411205	0.0216958	0.0320705	0.0185961	0.0228719	0.0323891	0.0419863	0.0427461	0.0283908	0.0378999	0.0481138	0.0433263	0.0726051	0.0492998	0.0542462	0.0474666	0.0417232	0.0242854	0.0209956	0.0165658	0.0208494	0.031114	0.0164308	0.0150174
-21.1331	0.0294853	0.164706	0.0320705	0.0185961	0.199219	0.0323891	0.0419863	0.0427461	0.0283908	0.0378999	0.0435142	0.0433263	0.0726051	0.0492998	0.0489066	0.0414149	0.0477534	0.0242854	0.0209956	0.0165658	0.0208494	0.031114	0.0164308	0.0150174
