# Supplementary material for: Revealing a hidden conducting state by manipulating the intracellular domains in KV10.1 exposes the coupling between two gating mechanisms
Source: eLife. 2024 Sep 11;12:RP91420. doi: 10.7554/eLife.91420 (PMC11390113; doi:10.7554/eLife.91420)
Supplement: Figure 6—source data 2. [file elife-91420-fig6-data2.xlsx]

## Sheet: Fig6C
Prepulse potential (mV)	∆PASCap (I/I@-20)								E600R (I/I@-20)								WT (I/I@-20)
-160.464	3.92633	4.72242	3.95238	5.78484	4.20619	3.14387	3.10657	2.61768	5.19828	3.81223	1.1252	2.59085	1.23011	1.30442	4.0557	1.9267	0.805429	0.858939	0.459301	0.680807	0.482069	0.55694	1.01049	0.968683	1.01087	1.05424
-140.461	1.33688	2.14795	2.34888	4.02699	1.74714	1.47047	1.9314	1.87776	3.80655	1.85535	1.06345	1.87269	1.09169	1.08894	2.67268	1.17506	0.966391	0.936207	0.687148	0.745071	0.73001	0.719178	1.02119	0.981028	1.03386	1.05039
-120.46	1.05014	1.33537	1.72439	2.22175	1.17209	1.13821	1.3615	1.40435	2.23741	1.29093	1.02525	1.22513	1.04096	1.02914	1.48333	0.939745	0.983585	0.946331	0.830021	0.812728	0.865448	0.820344	1.00744	0.980652	1.01475	1.02346
-100.5	0.990817	1.15735	1.49024	1.40888	1.06733	1.03685	1.17334	1.18447	1.53123	1.09481	1.00596	0.985243	1.01299	1.00413	1.12832	0.876602	0.978379	0.944883	0.900832	0.862138	0.923465	0.878734	0.995438	0.97865	0.994163	1.00107
-80.5838	0.98436	1.0883	1.3429	1.17057	1.02885	1.00222	1.08582	1.08408	1.24258	1.02578	1.00539	0.92848	1.00683	1.00077	1.01265	0.895551	0.978021	0.950874	0.938012	0.90378	0.947526	0.916287	0.991955	0.980857	0.9857	0.991328
-60.6522	0.99936	1.04175	1.23814	1.08318	1.01651	0.997673	1.03649	1.03527	1.11209	1.01533	1.02271	0.943938	1.01471	1.01561	1.01361	0.948369	0.981716	0.965345	0.960732	0.93567	0.969852	0.944838	0.991828	0.98566	0.984709	0.988615
-40.8817	1.01508	1.01591	1.0273	1.0333	0.999754	0.999377	1.00781	1.00994	1.0508	1.01388	1.02339	0.974894	1.01337	1.01553	1.01766	0.984763	0.990935	0.980463	0.978818	0.966233	0.985619	0.971987	0.99567	0.992536	0.989094	0.991442
-21.1331	1	1	1	1	1	1	1	1	1	1	1	1	1	1	1	1	1	1	1	1	1	1	1	1	1	1
