# Supplementary material for: Revealing a hidden conducting state by manipulating the intracellular domains in KV10.1 exposes the coupling between two gating mechanisms
Source: eLife. 2024 Sep 11;12:RP91420. doi: 10.7554/eLife.91420 (PMC11390113; doi:10.7554/eLife.91420)
Supplement: Figure 7—source data 1. — Related to Figure 7A. [file elife-91420-fig7-data1.xlsx]

## Sheet: Fig7A
V	-100							-160
-100	0.0202837	0	0	0				0.00348616	0	0	0
-80	0.0093579	0.00893819	0.00247587	0.00354766	0	0	0	0	0.0505935	0.0145191	0.00807138	0	0	0	0
-60	0	0.034373	0.0146561	0.0188038	0.0175315	0.00990413	0.0137945	0.0350096	0.167524	0.0936525	0.0471574	0.0320895	0.0277544	0.0374941	0.0506613
-40	0.0272405	0.111534	0.0599587	0.0753804	0.0601532	0.0569895	0.073494	0.0920148	0.336515	0.264757	0.162267	0.117576	0.122733	0.155597	0.174419
-20	0.0644113	0.235396	0.139107	0.163914	0.122989	0.140095	0.184911	0.194759	0.530242	0.468883	0.315546	0.276268	0.271554	0.334356	0.350861
0	0.115227	0.333799	0.207902	0.239021	0.197177	0.214035	0.308091	0.262838	0.721757	0.67661	0.460761	0.469242	0.409877	0.526245	0.536893
20	0.186371	0.339974	0.237228	0.267916	0.262353	0.241954	0.384154	0.309736	0.898206	0.871544	0.489614	0.663686	0.435306	0.677089	0.692322
40	0.300031	0.326714	0.291424	0.313073	0.356624	0.288627	0.393518	0.361505	1	1	0.370547	0.806489	0.365388	0.634399	0.756463
60	0.499529	0.446771	0.458704	0.473321	0.516182	0.452936	0.497192	0.497405	0.265391	0.36132	0.450803	1	0.475476	0.550323	0.676111
80	0.727663	0.689225	0.714059	0.722745	0.740838	0.71163	0.719641	0.689756	0.279749	0.460856	0.677694	0.693935	0.723653	0.729952	0.774019
100	1	1	1	1	1	1	1	1	0.461566	0.742957	1	0.859783	1	1	1
