# Supplementary material for: Revealing a hidden conducting state by manipulating the intracellular domains in KV10.1 exposes the coupling between two gating mechanisms
Source: eLife. 2024 Sep 11;12:RP91420. doi: 10.7554/eLife.91420 (PMC11390113; doi:10.7554/eLife.91420)
Supplement: Figure 7—source data 2. — Related to Figure 7B. [file elife-91420-fig7-data2.xlsx]

## Sheet: Fig7B
V	-100						-160
-100	0	0	0.0139876				0	0	0
-80	0.00464854	0.00231716	0	0	0	0	0.0123411	0.00338739	0.0152054	0	0	0
-60	0.0394219	0.0360714	0.0198243	0.0509132	0.0541742	0.0317027	0.0902734	0.0557614	0.179322	0.0734783	0.0735141	0.0558207
-40	0.138918	0.151328	0.133748	0.238875	0.267399	0.181246	0.329391	0.23058	0.518877	0.35444	0.349272	0.277298
-20	0.22745	0.289486	0.263376	0.461008	0.543271	0.379899	0.524687	0.442707	0.8403	0.698953	0.713974	0.599631
0	0.235829	0.37002	0.315684	0.574921	0.720791	0.504418	0.529463	0.619479	1	0.902175	0.993357	0.862057
20	0.219848	0.353617	0.308848	0.468002	0.636324	0.448176	0.348961	0.670233	0.920019	0.796639	1	0.927337
40	0.289636	0.367064	0.406918	0.398414	0.462774	0.379606	0.304389	0.48804	0.589795	0.489668	0.593798	0.684758
60	0.477463	0.511318	0.599427	0.523714	0.521419	0.495576	0.418245	0.533836	0.394446	0.536999	0.515742	0.545731
80	0.735072	0.740999	0.817631	0.745644	0.723502	0.717619	0.634411	0.733457	0.498843	0.742693	0.668689	0.73361
100	1	1	1	1	1	1	1	1	0.675573	1	0.91577	1
