# Supplementary material for: Revealing a hidden conducting state by manipulating the intracellular domains in KV10.1 exposes the coupling between two gating mechanisms
Source: eLife. 2024 Sep 11;12:RP91420. doi: 10.7554/eLife.91420 (PMC11390113; doi:10.7554/eLife.91420)
Supplement: Figure 7—source data 3. — Related to Figure 7C. [file elife-91420-fig7-data3.xlsx]

## Sheet: Fig7C
V	∆PASCap (G/Gmax)							∆PASCap L322H (G/Gmax
-100	-0.0019513	-0.000393639	-0.000949859	-0.00245078	-0.00106499	-0.00069844	-0.00101668	-0.00420412	-0.000470116	-0.000597884	-0.00156219	-0.00129841	-0.000969438
-90	0.025337	0.00951742	0.00764338	0.00656507	0.00559348	0.00780327	0.0111742	-0.00506744	0.000911519	-0.00169155	0.00206911	0.00475653	0.00228052
-80	0.0829906	0.0301796	0.0301372	0.0265741	0.0247549	0.0340706	0.0381699	-0.00797632	0.00437292	-0.0016495	0.00867709	0.0168331	0.00786949
-70	0.20171	0.0721049	0.0808738	0.074816	0.0685753	0.0939891	0.0877089	-0.00511098	0.00958867	0.00157042	0.0206945	0.0390044	0.0174081
-60	0.369648	0.144478	0.177416	0.163775	0.150511	0.195624	0.16283	-0.000733402	0.019026	0.00740085	0.0378297	0.0741218	0.0306755
-50	0.583958	0.275685	0.321762	0.304101	0.276228	0.337955	0.255732	0.00465709	0.0342415	0.018746	0.0599293	0.127472	0.0451655
-40	0.785623	0.440702	0.497172	0.479848	0.433887	0.483194	0.349702	0.01538	0.0621028	0.0462903	0.0853779	0.21068	0.0571654
-30	0.930832	0.619299	0.67194	0.669271	0.592972	0.602095	0.442501	0.0275538	0.126981	-0.0862934	0.153226	0.440603	0.0607481
-20	0.957568	0.896571	0.838601	1	0.778773	0.701182		0.147674		0.0460407			0.0421021
-10		0.643288	0.687831	0.651076	0.599069	0.686486	0.408206	0.0732851	0.0916231	0.105817	0.0787639	0.103174
0	1	0.719968	0.788493	0.7706	0.701954	0.674446	0.398969	0.130475	0.185708	0.184596	0.196174	0.235992
10	0.782097	0.654546	0.727399	0.729051	0.641971	0.587206	0.353337	0.191968	0.273858	0.268916	0.294238	0.317592
20	0.561339	0.544826	0.615828	0.626664	0.537353	0.476952	0.304654	0.247464	0.361254	0.352352	0.374235	0.370984
30	0.388701	0.437468	0.504585	0.520888	0.439667	0.399541	0.291002	0.311973	0.444784	0.435659	0.447026	0.41436	0.755064
40	0.291175	0.387666	0.442471	0.465888	0.400989	0.382208	0.318392	0.389803	0.530352	0.519664	0.519565	0.462743	0.709149
50	0.262524	0.394974	0.434897	0.466418	0.421159	0.413326	0.37803	0.471164	0.614466	0.601901	0.594627	0.523048	0.717855
60	0.275951	0.447515	0.473545	0.506522	0.476027	0.475335	0.458493	0.555019	0.697387	0.683301	0.670323	0.595197	0.751714
70	0.316463	0.525541	0.539025	0.57189	0.550627	0.554906	0.550555	0.639253	0.77342	0.757929	0.742755	0.670364	0.7935
80	0.370556	0.618822	0.625204	0.650493	0.63508	0.643204	0.64803	0.715334	0.843724	0.824758	0.809761	0.744664	0.839873
90	0.434966	0.720681	0.71791	0.734187	0.730093	0.734735	0.745628	0.79232	0.902453	0.883469	0.871967	0.819642	0.885065
100	0.498754	0.818047	0.815031	0.820649	0.824048	0.827343	0.838601	0.857118	0.948287	0.93193	0.92457	0.890679	0.930154
110	0.56055	0.916825	0.911148	0.90236	0.914827	0.916303	0.923009	0.922969	0.978565	0.966777	0.967897	0.952711	0.969679
120	0.614046	1	1	0.981785	1	1	1	1	1	1	1	1	1
