# Supplementary material for: Revealing a hidden conducting state by manipulating the intracellular domains in KV10.1 exposes the coupling between two gating mechanisms
Source: eLife. 2024 Sep 11;12:RP91420. doi: 10.7554/eLife.91420 (PMC11390113; doi:10.7554/eLife.91420)
Supplement: Figure 7—source data 4. — Related to Figure 7D. [file elife-91420-fig7-data4.xlsx]

## Sheet: Fig7D
V	E600R (G/Gmax)											E600RL322H (G/Gmax)
-100	-0.000946843	-0.000866866	-0.000410574	-0.00043653	-0.00065374	-0.000337799	0.000145692	5.69159e-05	-0.00041039	-0.000494029	-0.000591145	-0.00216148	-0.00108939	-0.000929912	-0.00106534	-0.00143972	-0.000538366	-0.00076684
-90	0.00371417	0.0142105	0.00221966	0.000875877	0.0136659	0.00239918	0.00450084	0.00576548	0.0103112	0.00158642	0.0013304	0.0134345	-0.00302717	0.00709388	0.0265192	0.00931873	0.00619813	0.0106007
-80	0.0257375	0.071222	0.0172619	0.0075691	0.063336	0.0159247	0.0218556	0.0289452	0.0457717	0.0091071	0.0107572	0.0391432	-0.00411923	0.0199919	0.0667889	0.0260678	0.0179226	0.028269
-70	0.0966221	0.22905	0.0729196	0.0343242	0.206343	0.0648395	0.0768725	0.0979876	0.147979	0.0338103	0.042452	0.0727283	-0.00432563	0.034578	0.115905	0.0471204	0.0352806	0.0504474
-60	0.253223	0.500304	0.217071	0.111892	0.472863	0.188396	0.214422	0.254377	0.361577	0.107947	0.121156	0.112294	-0.00454853	0.0469437	0.159469	0.0636721	0.0536677	0.0707151
-50	0.508432	0.733564	0.457761	0.266307	0.757683	0.420341	0.43617	0.495631	0.635131	0.270172	0.273274	0.161297	-0.00424998	0.0514471	0.192308	0.0711692	0.0723281	0.0850335
-40	0.733053	0.855468	0.71175	0.46456	0.92014	0.718627	0.683082	0.734293	0.859698	0.51918	0.482711	0.276358	-0.0053372	0.0478959	0.227526	0.0687488	0.0920515	0.0933346
-30	0.842371	0.894169	0.87653	0.631104	0.941437	1	0.86947	0.898178	0.979407	0.794054	0.698023		-0.0422877	0.0378625	0.354269	0.0596868	0.127026	0.102236
-20	0.883725	0.857457	0.970204	0.713214	0.772001		1	1	0.953899		0.954933	-0.0319265	0.102197	0.013311		0.0173546	0.329548	0.0908808
-10	1		0.85908	0.750741		0.851566	0.884432	0.946127		0.868818	0.70103	0.0900715	0.113866	-0.139095	0.131172		0.129444
0	0.843548	1	0.786369	0.6935	1	0.935576	0.947785	0.950736	1	0.900099	0.79661	0.175796	0.184457	inf	0.257442	0.46262	0.224856	0.406397
10	0.704375	0.855933	0.659938	0.604759	0.715196	0.833278	0.881859	0.862311	0.830466	0.829127	0.738593	0.253311	0.256912	0.763997	0.345538	0.417907	0.293834	0.405794
20	0.539542	0.705777	0.539391	0.509638	0.506942	0.686495	0.759128	0.724417	0.672781	0.702653	0.639072	0.328707	0.321234	0.561961	0.413298	0.418703	0.353113	0.419189
30	0.410574	0.558568	0.462851	0.444721	0.352812	0.541177	0.628025	0.569139	0.536755	0.562506	0.534202	0.405011	0.384478	0.50443	0.467944	0.428187	0.407618	0.430753
40	0.347484	0.452497	0.443987	0.427714	0.265269	0.448895	0.506768	0.444766	0.440023	0.456622	0.470768	0.482613	0.450268	0.497773	0.524302	0.454177	0.461712	0.44684
50	0.351574	0.4046	0.473105	0.45612	0.229795	0.407578	0.439706	0.380439	0.39749	0.415657	0.462303	0.563666	0.519321	0.528033	0.589396	0.505052	0.523326	0.476262
60	0.392744	0.408496	0.53227	0.516909	0.224798	0.415438	0.415151	0.369436	0.396259	0.423857	0.491255	0.642979	0.587454	0.581049	0.663157	0.575031	0.596046	0.519929
70	0.455994	0.440813	0.609065	0.594974	0.235056	0.447615	0.427179	0.389917	0.417572	0.466594	0.548239	0.71824	0.656514	0.645563	0.734258	0.650348	0.670505	0.572043
80	0.530861	0.487306	0.695013	0.682108	0.25322	0.497304	0.459652	0.427227	0.453791	0.528449	0.618325	0.789467	0.72661	0.717397	0.801978	0.729522	0.745357	0.658041
90	0.617453	0.542631	0.780774	0.77034	0.272853	0.555259	0.50555	0.47404	0.497119	0.608567	0.694013	0.854571	0.793169	0.793976	0.865007	0.808375	0.81805	0.721192
100	0.703556	0.600669	0.862397	0.854923	0.292404	0.615428	0.556964	0.527788	0.544475	0.704091	0.78	0.916224	0.86298	0.869209	0.921893	0.881327	0.886124	0.80448
110	0.794035	0.66063	0.935426	0.932228	0.309077	0.675609	0.610793	0.583982	0.591774	0.900648	0.890804	0.96479	0.923776	0.938958	0.965823	0.946727	0.948164	0.906339
120	0.879288	0.716511	1	1	0.32139	0.732002	0.665305	0.638768	0.636302	1	1	1	1	1	1	1	1	1
