# Supplementary material for: Revealing a hidden conducting state by manipulating the intracellular domains in KV10.1 exposes the coupling between two gating mechanisms
Source: eLife. 2024 Sep 11;12:RP91420. doi: 10.7554/eLife.91420 (PMC11390113; doi:10.7554/eLife.91420)
Supplement: Figure 8—source data 1. — Related to Figure 8C. [file elife-91420-fig8-data1.xlsx]

## Sheet: Fig8C
V	∆PASCap							∆PASCap BDN							∆PASCap BDC2
-100	-0.0019513	-0.000393639	-0.000949859	-0.00245078	-0.00106499	-0.00069844	-0.00101668	-0.00061426	-0.00133526	-0.00115569	-0.000865251	-0.000216695	-0.000449395	-0.000694558	-0.00048912	-0.000736924	-0.00112462	-0.00340067	-0.00378899	-0.000490451	-0.00180461
-90	0.025337	0.00951742	0.00764338	0.00656507	0.00559348	0.00780327	0.0111742	-0.000357655	-0.000590939	-0.00363714	-0.000817898	0.0028451	0.000825027	0.00102279	-0.00456217	-0.0016368	-0.00172404	-0.00958824	-0.0083445	0.000307348	-0.00545796
-80	0.0829906	0.0301796	0.0301372	0.0265741	0.0247549	0.0340706	0.0381699	0.00496289	0.00123048	-0.00376488	0.00300403	0.0156765	0.00765449	0.00783071	-0.00872997	-0.00236407	-0.00158882	-0.0139668	-0.0101769	0.00281331	-0.00781154
-70	0.20171	0.0721049	0.0808738	0.074816	0.0685753	0.0939891	0.0877089	0.0263288	0.0103339	0.00269067	0.0188162	0.0549632	0.031141	0.031651	-0.015104	-0.00257863	-0.000224695	-0.0177806	-0.0102172	0.00904405	-0.0100988
-60	0.369648	0.144478	0.177416	0.163775	0.150511	0.195624	0.16283	0.0891854	0.0400817	0.0275622	0.064236	0.157387	0.0929247	0.0990223	-0.0224309	-0.00182751	0.00326422	-0.0203707	-0.00661729	0.0223398	-0.0111723
-50	0.583958	0.275685	0.321762	0.304101	0.276228	0.337955	0.255732	0.232154	0.111817	0.0935534	0.170501	0.359743	0.229446	0.244804	-0.0323035	0.000758977	0.0100335	-0.0234307	2.20677e-05	0.0488552	-0.0126924
-40	0.785623	0.440702	0.497172	0.479848	0.433887	0.483194	0.349702	0.482718	0.250735	0.227696	0.351995	0.650119	0.464811	0.493337	-0.0506514	0.00541304	0.0218203	-0.0345835	0.0122804	0.114964	-0.018677
-30	0.930832	0.619299	0.67194	0.669271	0.592972	0.602095	0.442501	0.813939	0.456521	0.445194	0.577188	1	0.80684	0.804311	-0.16424	0.00305785	0.0415007	-0.134565	0.0295462		-0.0853608
-20	0.957568	0.896571	0.838601	1	0.778773	0.701182					0.845406				0.262064	0.0196744	0.0124882	0.217573	0.131557	-0.0323227	0.0929705
-10		0.643288	0.687831	0.651076	0.599069	0.686486	0.408206	0.732945	0.443658	0.415264	0.547774	0.655528	0.755299		0.13513	0.0415805	0.0678507	0.149011	0.0996061	0.0381896	0.0795541
0	1	0.719968	0.788493	0.7706	0.701954	0.674446	0.398969	1	0.569124	0.582268	0.684341	0.849947	1	0.945339	0.125502	0.0738231	0.0973804	0.153593	0.1466	0.0882552	0.0940824
10	0.782097	0.654546	0.727399	0.729051	0.641971	0.587206	0.353337	0.980638	0.54331	0.576084	0.632133	0.906332	0.969217	1	0.128193	0.101498	0.116072	0.161174	0.166982	0.0929107	0.0994053
20	0.561339	0.544826	0.615828	0.626664	0.537353	0.476952	0.304654	0.83901	0.467228	0.50538	0.542023	0.863895	0.812414	0.931944	0.137206	0.129823	0.134408	0.163099	0.171854	0.10651	0.0986316
30	0.388701	0.437468	0.504585	0.520888	0.439667	0.399541	0.291002	0.633614	0.402707	0.430353	0.461065	0.767103	0.615129	0.784801	0.164152	0.171146	0.166941	0.174205	0.176333	0.129614	0.106906
40	0.291175	0.387666	0.442471	0.465888	0.400989	0.382208	0.318392	0.4434	0.386967	0.399105	0.432129	0.601207	0.448957	0.596447	0.218994	0.234719	0.226659	0.208588	0.200723	0.173612	0.137675
50	0.262524	0.394974	0.434897	0.466418	0.421159	0.413326	0.37803	0.326725	0.420386	0.417438	0.459865	0.413502	0.357703	0.421902	0.303082	0.320819	0.311533	0.266192	0.249657	0.242606	0.19152
60	0.275951	0.447515	0.473545	0.506522	0.476027	0.475335	0.458493	0.281309	0.496587	0.475827	0.527127	0.298029	0.333139	0.323891	0.411268	0.422647	0.412793	0.353555	0.329727	0.335201	0.266146
70	0.316463	0.525541	0.539025	0.57189	0.550627	0.554906	0.550555	0.279837	0.599177	0.556875	0.616127	0.262161	0.355412	0.295921	0.536595	0.53233	0.522553	0.448251	0.419921	0.446524	0.355956
80	0.370556	0.618822	0.625204	0.650493	0.63508	0.643204	0.64803	0.296019	0.709214	0.651593	0.713412	0.267702	0.407155	0.311572	0.666427	0.644027	0.63508	0.55536	0.523991	0.569758	0.459567
90	0.434966	0.720681	0.71791	0.734187	0.730093	0.734735	0.745628	0.317615	0.814085	0.747419	0.80706	0.293344	0.476419	0.348844	0.786654	0.753416	0.744783	0.674793	0.643489	0.694483	0.578202
100	0.498754	0.818047	0.815031	0.820649	0.824048	0.827343	0.838601	0.335851	0.902053	0.841195	0.888921	0.325157	0.55362	0.39517	0.886122	0.852166	0.84534	0.791234	0.760615	0.812989	0.709651
110	0.56055	0.916825	0.911148	0.90236	0.914827	0.916303	0.923009	0.349963	0.96493	0.922854	0.953348	0.357859	0.633398	0.4438	0.958079	0.930945	0.930535	0.901562	0.895292	0.915349	0.84593
120	0.614046	1	1	0.981785	1	1	1	0.360467	1	1	1	0.387815	0.706325	0.488851	1	1	1	1	1	1	1

## Sheet: Fig8D
V (mV)	E600R (G/Gmax)											E600R BDC2 (G/Gmax)											E600R BDN (G/Gmax)
-100	-0.000946843	-0.000866866	-0.000410574	-0.00043653	-0.00065374	-0.000337799	0.000145692	5.69159e-05	-0.00041039	-0.000494029	-0.000591145	-0.00057312	0.000944885	0.0004756	5.3327e-05	-0.00221448	0.000256646	4.48115e-05	-0.00188626	-0.00441015	-0.00270265	-0.00106943	-0.000578088	-7.7636e-05	-0.000540443	-3.59408e-05	-0.000546981	-0.00107228	-0.000831141	-0.00077413	-0.0030953
-90	0.00371417	0.0142105	0.00221966	0.000875877	0.0136659	0.00239918	0.00450084	0.00576548	0.0103112	0.00158642	0.0013304	-0.00313644	0.00390752	0.00152086	-0.00144481	-0.00777391	0.000656013	0.00638907	-0.0132775	-0.00252279	0.000846714	0.00230021	0.0134571	0.00580287	0.00623265	0.00691634	0.0114377	0.00966909	0.00535423	0.00458833	-0.00211455
-80	0.0257375	0.071222	0.0172619	0.0075691	0.063336	0.0159247	0.0218556	0.0289452	0.0457717	0.0091071	0.0107572	6.11908e-05	0.0166403	0.00700612	0.00228215	-0.0070092	0.00250477	0.0206657	-0.0220108	0.00472124	0.0107491	0.01421	0.046661	0.0325783	0.0304811	0.031339	0.053147	0.0380682	0.0341039	0.0268036	0.00502175
-70	0.0966221	0.22905	0.0729196	0.0343242	0.206343	0.0648395	0.0768725	0.0979876	0.147979	0.0338103	0.042452	0.0162264	0.0563477	0.0252137	0.0176135	0.0102115	0.0101349	0.0622312	-0.0142482	0.0261826	0.0387404	0.049889	0.124577	0.105074	0.0974136	0.086604	0.156276	0.105671	0.102771	0.0887623	0.0319325
-60	0.253223	0.500304	0.217071	0.111892	0.472863	0.188396	0.214422	0.254377	0.361577	0.107947	0.121156	0.0614699	0.151017	0.0699643	0.0577432	0.0599592	0.031058	0.152998	0.0258252	0.0765829	0.0982523	0.129367	0.275181	0.254371	0.251382	0.198057	0.35115	0.232927	0.235901	0.214696	0.0929149
-50	0.508432	0.733564	0.457761	0.266307	0.757683	0.420341	0.43617	0.495631	0.635131	0.270172	0.273274	0.155069	0.315034	0.160402	0.132173	0.160213	0.075141	0.31061	0.0988777	0.162498	0.195882	0.253398	0.506204	0.489647	0.473921	0.355899	0.677286	0.420938	0.430684	0.406973	0.204611
-40	0.733053	0.855468	0.71175	0.46456	0.92014	0.718627	0.683082	0.734293	0.859698	0.51918	0.482711	0.294867	0.511414	0.306588	0.234943	0.312866	0.149948	0.509467	0.196493	0.27469	0.322387	0.391236	0.759606	0.76018	0.704086	0.524116	0.829255	0.639854	0.652105	0.609946	0.358485
-30	0.842371	0.894169	0.87653	0.631104	0.941437	1	0.86947	0.898178	0.979407	0.794054	0.698023	0.469605	0.696878	0.473398	0.354236	0.487114	0.255068	0.693278	0.283709	0.403642	0.43971	0.49815	1	1	0.889023	0.694201	0.951982	0.842107	0.854712	0.791517	0.55308
-20	0.883725	0.857457	0.970204	0.713214	0.772001		1	1	0.953899		0.954933			0.745732		0.644266		0.851456			0.546537	0.583549			1		1		1	1
-10	1		0.85908	0.750741		0.851566	0.884432	0.946127		0.868818	0.70103	0.486911	0.618842	0.505841	0.378617	0.542296	0.271469	0.787734	0.300002	0.431944	0.464197	0.537341	0.825089	0.845571	0.862109	0.640796	0.993647	0.895001	0.943124	0.631481	0.571099
0	0.843548	1	0.786369	0.6935	1	0.935576	0.947785	0.950736	1	0.900099	0.79661	0.54517	0.569609	0.543267	0.400505	0.562102	0.304999	0.776582	0.313418	0.456782	0.484122	0.527556	0.935397	0.937837	0.86033	0.625299	0.953605	0.90019	0.938743	0.867548	0.655862
10	0.704375	0.855933	0.659938	0.604759	0.715196	0.833278	0.881859	0.862311	0.830466	0.829127	0.738593	0.509542	0.478284	0.476777	0.376957	0.49301	0.28682	0.66736	0.297292	0.454518	0.446177	0.486035	0.883211	0.87091	0.755946	0.554126	0.851671	0.813141	0.830063	0.881331	0.641909
20	0.539542	0.705777	0.539391	0.509638	0.506942	0.686495	0.759128	0.724417	0.672781	0.702653	0.639072	0.44753	0.395859	0.385679	0.336868	0.420022	0.246416	0.537671	0.27358	0.436345	0.394407	0.444194	0.768573	0.743469	0.640765	0.474406	0.72333	0.690908	0.680524	0.840172	0.575691
30	0.410574	0.558568	0.462851	0.444721	0.352812	0.541177	0.628025	0.569139	0.536755	0.562506	0.534202	0.389031	0.341453	0.33026	0.310661	0.372877	0.20769	0.436116	0.261712	0.414605	0.344822	0.412515	0.640458	0.611764	0.540569	0.410327	0.592885	0.572734	0.530919	0.751368	0.494841
40	0.347484	0.452497	0.443987	0.427714	0.265269	0.448895	0.506768	0.444766	0.440023	0.456622	0.470768	0.370177	0.328367	0.305614	0.307421	0.367185	0.190009	0.387241	0.274651	0.408649	0.330286	0.406239	0.535535	0.513622	0.470517	0.384395	0.493593	0.49884	0.42374	0.634757	0.438422
50	0.351574	0.4046	0.473105	0.45612	0.229795	0.407578	0.439706	0.380439	0.39749	0.415657	0.462303	0.385342	0.357389	0.319956	0.335398	0.393166	0.199913	0.396202	0.308943	0.435266	0.355201	0.433251	0.47655	0.472601	0.448098	0.401282	0.455288	0.483229	0.369952	0.510177	0.427771
60	0.392744	0.408496	0.53227	0.516909	0.224798	0.415438	0.415151	0.369436	0.396259	0.423857	0.491255	0.435038	0.414508	0.364864	0.392395	0.438184	0.233345	0.439677	0.362681	0.486833	0.411119	0.484506	0.469781	0.484732	0.463082	0.457426	0.462559	0.516849	0.359774	0.416942	0.453962
70	0.455994	0.440813	0.609065	0.594974	0.235056	0.447615	0.427179	0.389917	0.417572	0.466594	0.548239	0.507484	0.494624	0.433803	0.470167	0.497467	0.286041	0.508133	0.434004	0.551904	0.48526	0.551342	0.495552	0.535547	0.507461	0.513903	0.501495	0.578483	0.382785	0.366829	0.508506
80	0.530861	0.487306	0.695013	0.682108	0.25322	0.497304	0.459652	0.427227	0.453791	0.528449	0.618325	0.59163	0.587734	0.523878	0.562622	0.585187	0.363805	0.595069	0.517505	0.631422	0.573401	0.62832	0.542888	0.610188	0.575713	0.622355	0.558379	0.658548	0.429348	0.351303	0.587695
90	0.617453	0.542631	0.780774	0.77034	0.272853	0.555259	0.50555	0.47404	0.497119	0.608567	0.694013	0.690499	0.688354	0.632518	0.66834	0.667883	0.473713	0.691034	0.610986	0.70815	0.673431	0.717917	0.59786	0.699338	0.636404	0.731147	0.626778	0.744012	0.492611	0.360246	0.685916
100	0.703556	0.600669	0.862397	0.854923	0.292404	0.615428	0.556964	0.527788	0.544475	0.704091	0.78	0.792381	0.794685	0.756769	0.777301	0.787868	0.630376	0.794133	0.72078	0.797515	0.783341	0.808724	0.660944	0.792428	0.714291	0.786156	0.699636	0.835934	0.570952	0.384847	0.792641
110	0.794035	0.66063	0.935426	0.932228	0.309077	0.675609	0.610793	0.583982	0.591774	0.900648	0.890804	0.895329	0.898995	0.878551	0.899919	0.88585	0.814235	0.901236	0.847591	0.903299	0.895594	0.903994	0.723707	0.886028	0.78969	0.912497	0.774287	0.924104	0.66583	0.418489	0.899871
120	0.879288	0.716511	1	1	0.32139	0.732002	0.665305	0.638768	0.636302	1	1	1	1	1	1	1	1	1	1	1	1	1	0.777603	0.972117	0.783944	1	0.844477	1	0.762967	0.459186	1
